# Supplementary material for: Massive red-shifting of Ce3+ emission by Mg2+ and Si4+ doping of YAG:Ce transparent ceramic phosphors
Source: Royal Society of Chemistry journal article supplement (doi:10.1039/c8tc03866j), 2018-01-01
Supplement: c8tc03866j1.pdf [file c8tc03866j1.pdf]

Supplementary Information

**Massive red-shifting of Ce<sup>3+</sup> emission by Mg<sup>2+</sup> and Si<sup>4+</sup> doping of YAG:Ce transparent ceramic phosphors**

Qiping Du<sup>a,b,†</sup>, Shaowei Feng<sup>a,b,†</sup>, Haiming Qin<sup>b,\*</sup>, Hui Hua<sup>a,b</sup>, Hui Ding<sup>b</sup>, Lin Jia<sup>a</sup>,

Zhijun Zhang<sup>a,\*</sup>, Jun Jiang<sup>b</sup>, Haochuan Jiang<sup>b,\*</sup>

<sup>a</sup> School of Materials Science and Engineering, Shanghai University, Shanghai

200072, China

<sup>b</sup> Ningbo Institute of Materials Technology and Engineering, Chinese Academy of

Sciences, Ningbo 315201, China

**Table S1.** Main parameters determined with Rietveld refinements

| Formula                           | YAG:Ce                                           | Y <sub>3</sub> Mg <sub>0.5</sub> Al <sub>4</sub> Si <sub>0.5</sub> O <sub>12</sub> :Ce | Y <sub>3</sub> MgAl <sub>3</sub> SiO <sub>12</sub> :Ce | Y <sub>3</sub> Mg <sub>2</sub> AlSi <sub>2</sub> O <sub>12</sub> :Ce |
|-----------------------------------|--------------------------------------------------|----------------------------------------------------------------------------------------|--------------------------------------------------------|----------------------------------------------------------------------|
| space group                       | Ia3d                                             | Ia3d                                                                                   | Ia3d                                                   | Ia3d                                                                 |
| vol(Å <sup>3</sup> )              | 1733.10                                          | 1739.52                                                                                | 1749.04                                                | 1762.44                                                              |
| unit cell dimens(Å)               | a = b = c<br>= 12.0146                           | a = b = c<br>= 12.0243                                                                 | a = b = c<br>= 12.0454                                 | a = b = c<br>= 12.0750                                               |
| Ce–O distances(Å)                 | d <sub>1</sub> = 2.311<br>d <sub>2</sub> = 2.448 | d <sub>1</sub> = 2.308<br>d <sub>2</sub> = 2.453                                       | d <sub>1</sub> = 2.303<br>d <sub>2</sub> = 2.457       | d <sub>1</sub> = 2.3<br>d <sub>2</sub> = 2.461                       |
| Structure distortion <sup>D</sup> | 27.9%                                            | 29.5%                                                                                  | 31.3%                                                  | 32.9%                                                                |
| reliability factors               | R <sub>wp</sub> =7.31%                           | R <sub>wp</sub> =8.93%                                                                 | R <sub>wp</sub> =10.11%                                | R <sub>wp</sub> =10.62%                                              |
|                                   | R <sub>p</sub> =6.79%                            | R <sub>p</sub> =7.04%                                                                  | R <sub>p</sub> =8.56%                                  | R <sub>p</sub> =8.33%                                                |
|                                   | χ <sup>2</sup> =6.65                             | χ <sup>2</sup> =6.48                                                                   | χ <sup>2</sup> =7.44                                   | χ <sup>2</sup> =8.35                                                 |

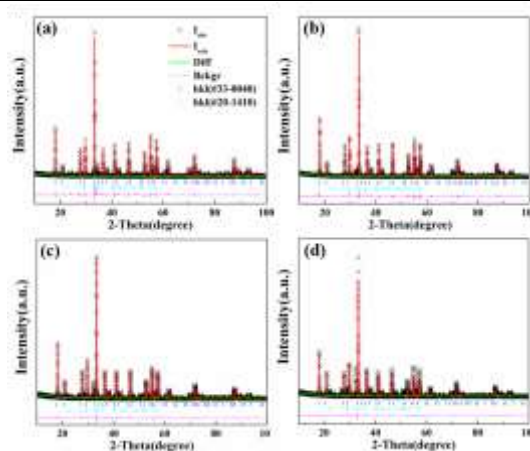

Fig. S1 X-ray Rietveld refinements for YMASG:Ce ceramics (a)x=0, (b)x=0.5, (c)x=1, (d)x=2

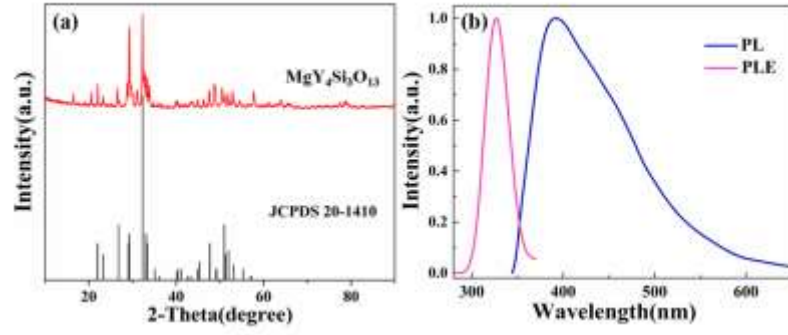

Fig. S2 (a) Diffraction peaks of the as prepared  $\text{MgY}_4\text{Si}_3\text{O}_{13}:\text{Ce}^{3+}$  powders and the standard diffraction of  $\text{MgY}_4\text{Si}_3\text{O}_{13}$  (JCPDS 20-1410). (b) The PLE ( $\lambda_{\text{em}}=406$  nm) and PL ( $\lambda_{\text{ex}}=327$  nm) spectra of as prepared  $\text{MgY}_4\text{Si}_3\text{O}_{13}:\text{Ce}$  powders.
